Nipah virus from bats - another potential pandemic? Risk mapping the impact of anthropogenic and climate change on the transmission of Nipah virus infection to humans.

Authors: Varsha Balachandra Kumar, Nicola J Rooney, and Andrew Carr

The authors have withdrawn their manuscript as they are reviewing the study and the manuscript. Therefore, the authors do not wish this work to be cited as reference for the project. If you have any questions, please contact the corresponding author.
